# Supplementary material for: Integration of High-Volume Molecular and Imaging Data for Composite Biomarker Discovery in the Study of Melanoma
Source: Hindawi journal article supplement (doi:10.1155/2014/145243), 2014-01-01

**LDA in original microarray data**

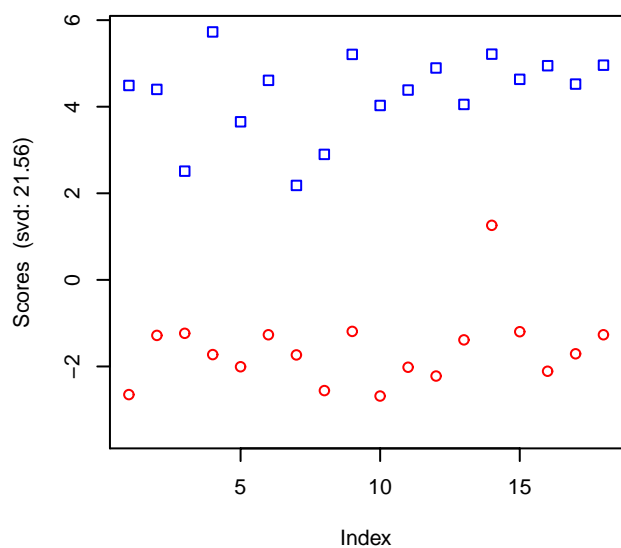

**LDA in original image data**

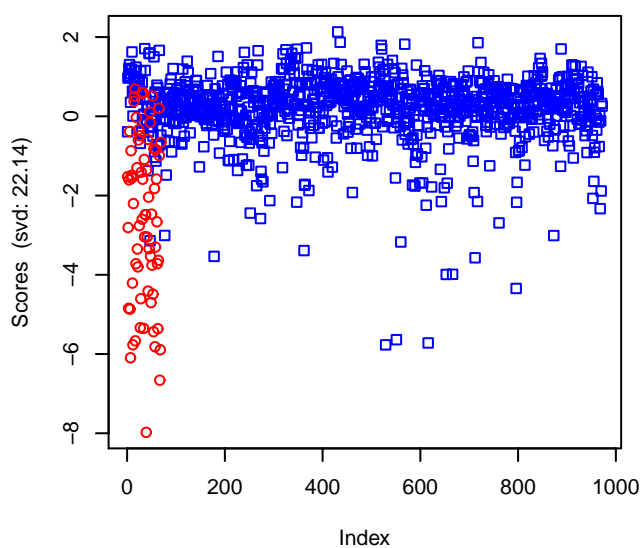

**LDA with mean Imputation data**

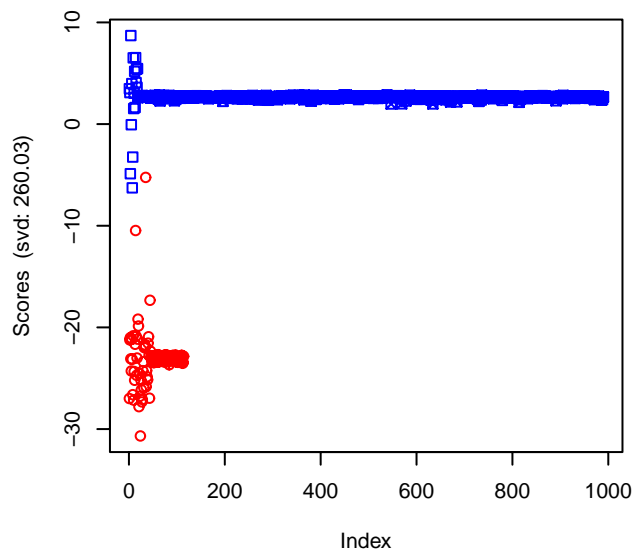

**LDA with normal random imputation data**

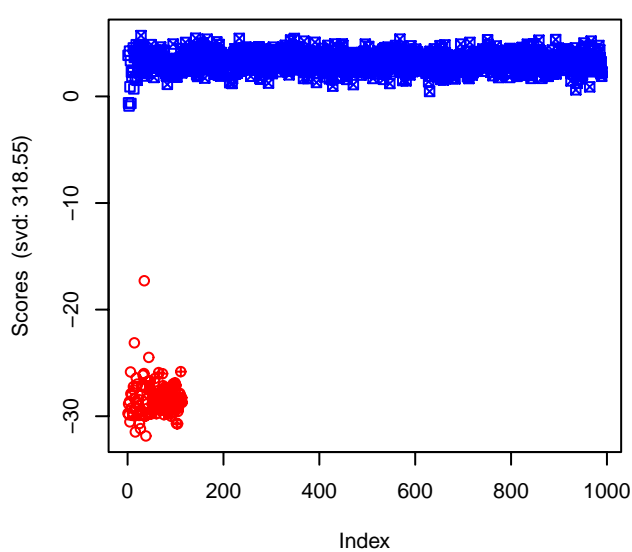

**LDA with uniform imputation data**

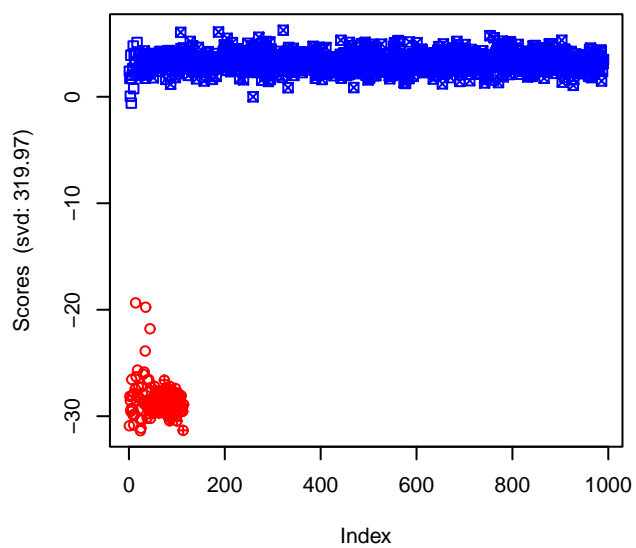

**LDA with bootstrap imputation data**

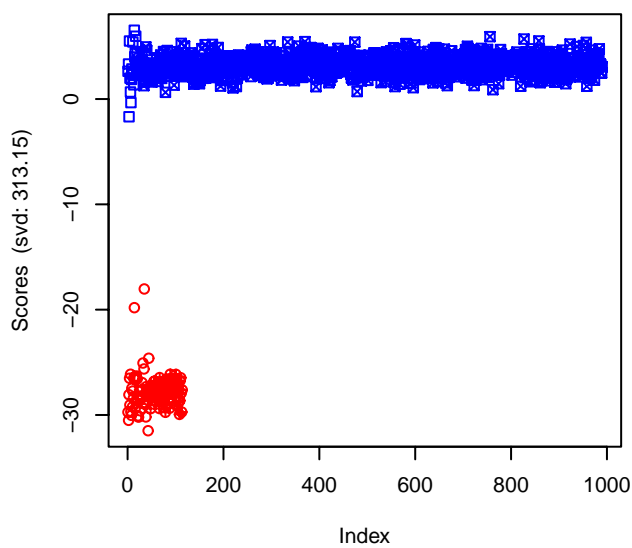

Supplement: f2 [file 145243.f2.pdf]
